# Supplementary material for: Homatula guanheensis sp. nov. (Teleostei: Nemacheilidae), a new species of loach from Henan Province, China
Source: Biodivers Data J. 2021 Jun 16;9:e65130. doi: 10.3897/BDJ.9.e65130 (PMC8222201; doi:10.3897/BDJ.9.e65130)
Supplement: Supplementary material 1 — Morphometric characters of Homatula variegata, H. berezowskii, H. longidorsalis and H. laxiclathra from Gu and Zhang (2011). [file bdj-09-e65130-s001.xlsx]

## Sheet: Table2
	H. varigata (n=37)a			H. berezowskii (n=10)a			H. longidorsalis(n=8)a			H. laxiclathra(n=21)a
	range	mean	SD	range	mean	SD	range	mean	SD	range	mean	SD
Standard length (mm)	66.1-129.6	90.7		65.4-125.4	105.8		50.3-80.9	64.7		67.6-121.9	88.9
As%SL
Body depth	9.9-15.3	12.9	1.3	9.3-12.3	10.9	1.5	13.1-14.7	13.8	0.5	10.0-15.8	12.5	1.8
Head length	18.3-22.7	20.5	1.3	15.6-18.5	17.2	1.4	21.5-25.3	23.2	1.3	15.9-21.1	18.8	1.3
Dorsal-fin length	9.3-14.1	11.1	1.1	9.2-11.2	9.9	1	10.0-11.9	11	0.7	8.7-12.7	10.5	1.1
Pectoral-fin length	10.4-15.5	12.4	1.2	11.0-13.0	12	1	13.0-15.5	14.2	0.9	10.8-14.9	13.1	1.1
Pelvic-fin length	9.4-13.3	11	0.9	10.1-12.6	10.9	1.3	11.0-13.5	12	0.8	9.0-12.7	10.9	0.9
Anal-fin length	8.6-11.7	10	0.8	7.4-10.8	8.7	1.7	10.2-12.0	11.1	0.5	6.9-10.4	8.8	1
Predorsal length	41.7-49.7	46.9	1.8	43.0-47.7	44.8	2.4	48.1-52.8	50.4	1.7	41.9-50.6	46.6	2.3
Preanus length	17.2-24.4	20.7	1.6	15.9-18.9	17.2	1.5	22.0-26.0	23.7	1.3	15.9-21.1	18.8	1.2
Prepelvic length	43.9-51.1	48.3	1.8	42.9-47.5	45.3	2.3	50.5-56.7	52.6	1.9	43.8-52.2	48.5	1.9
Preanal length	69.8-77.6	73.2	2.2	69.2-73.6	72.1	2.2	74.6-83.6	78.3	3	69.5-75.8	73	1.7
Caudal peduncle depth	9.6-13.6	11.6	1	9.1-10.9	10	0.9	11.4-13.3	12.3	0.7	8.4-11.4	9.2	0.7
Caudal peduncle length	16.1-22.7	19.6	1.6	18.7-21.7	20.2	1.5	17.1-19.6	18.7	0.8	15.5-22.0	18.6	1.7
As%Caudal peduncle lepth
caudal-peduncle dength	43.6-78.8	59.6	7.7	42.8-54.4	49.5	5.9	62.1-70.0	65.9	2.6	41.2-66.2	50.2	6.5
As%HL
Head depth	43.7-56.8	49.4	3.3	45.3-49.9	47.8	2.3	47.2-53.9	50.4	2.6	42.7-56.5	48.1	3.6
Head width	50.8-65.5	58.1	3.7	56.7-69.0	61.9	6.2	52.2-61.8	56.4	2.7	47.1-68.0	57	5.7
Eye diameter	11.3-15.9	13.7	1.1	13.8-16.9	15.2	1.5	13.8-18.4	16.7	1.6	13.8-18.0	16	1.2
Snout length	40.0-50.0	44.5	2.5	40.4-46.3	42.5	3	41.3-48.4	44	2.1	35.5-45.3	40.7	2.5
Interorbital width	20.0-28.4	25.5	1.7	24.1-29.7	27	2.8	23.7-29.7	27.2	2	19.9-24.9	22.5	1.4
